# Supplementary material
Source: PubMed Central journal article supplement (PMC2950353)
Supplement: supp_78_10_4122__1.pdf [file supp_78_10_4122__1.pdf]

## Legends to Supplemental Figures

S1. Binding curves for the interactions of DNA targets with the *E. coli* TcpP-HSV<sup>+</sup> (TG387) membrane preparation. The % shifted values for each DNA target were plotted as a function of membrane protein concentration used in mobility shift experiments as presented in Fig. 3. The binding curves for the parental promoter target and derivatives carrying transversions at positions –56 through –48 (Panel A) and positions –47 through –38 (Panel B), as indicated on the right side of the figure, with a vertical arrow indicating the position of the pentameric repeat motif present in the region of the *toxT* promoter analyzed. The intercept of each binding curve with the dashed horizontal line drawn at 50% shifted indicates the concentration of membrane protein required for a 50% shift of each DNA target, as presented in Table 2.

S2. Binding curves for the interactions of DNA targets with the *V. cholerae* ToxR-HA<sup>+</sup> (TG129) membrane preparation. The % shifted values for each DNA target were plotted as a function of the membrane protein concentration used in mobility shift experiments as presented in S3. The binding curves for the parental promoter target and derivatives carrying transversions at positions –56 through –48 (Panel A) and positions –47 through –38 (Panel B), as indicated on the right side of the figure, with a vertical arrow indicating the position of the pentameric repeat motif present in the region of the *toxT* promoter analyzed. The intercept of each binding curve with the dashed horizontal line drawn at 50% shifted indicates the concentration of membrane protein required for a 50% shift of each DNA target, as presented in Table 3.

S3. Electrophoretic mobility shift assay for the binding of DNA targets to proteins present in *V. cholerae* ToxR<sup>-</sup> (TG128) and ToxR<sup>+</sup> (TG129) membrane preparations. The composite image was generated from a single piece of autoradiography film displaying migration patterns from five different gel runs (Panels A to E) as described in the legend to Fig. 3. For Panels A to E, the parental promoter (lanes 1, 2 and 3) or single transversion derivatives at positions -56 to -38 (lanes 4 to 22, respectively), are indicated at the top of the figure. The horizontal arrows above each panel indicate the positions of the pentameric repeat motifs within the TcpP-footprinted region of the *toxT* promoter. For lanes 3 to 22, the DNA-binding solutions containing end-labeled DNA targets were mixed with membrane buffer only (Panel A) or *V. cholerae* ToxR<sup>+</sup> membrane preparation at either 0.21 mg/ml (Panel B), 0.43 mg/ml (Panel C), 0.86 mg/ml (Panel D) or 1.7 mg/ml (Panel E), as indicated on the right side of the figure. DNA-membrane solutions were treated as described in the legend to Fig. 3. The positions of free and shifted end-labeled DNA target migration through the gel are indicated in the column between lanes 2 and 3. The % shifted values given below the free target signal for each sample indicate the percentage of shifted signal, relative to the sum of free and shifted signals, as quantified by densitometry. Control samples containing the parental target mixed with either membrane buffer only (lane 1) or negative control *V. cholerae* ToxR<sup>-</sup> membrane preparation (lane 2), present at the same protein concentration as the experimental membrane preparation used for lanes 3-22, as indicated on the right side of each panel, were included in each gel run where appropriate.





Figure S2

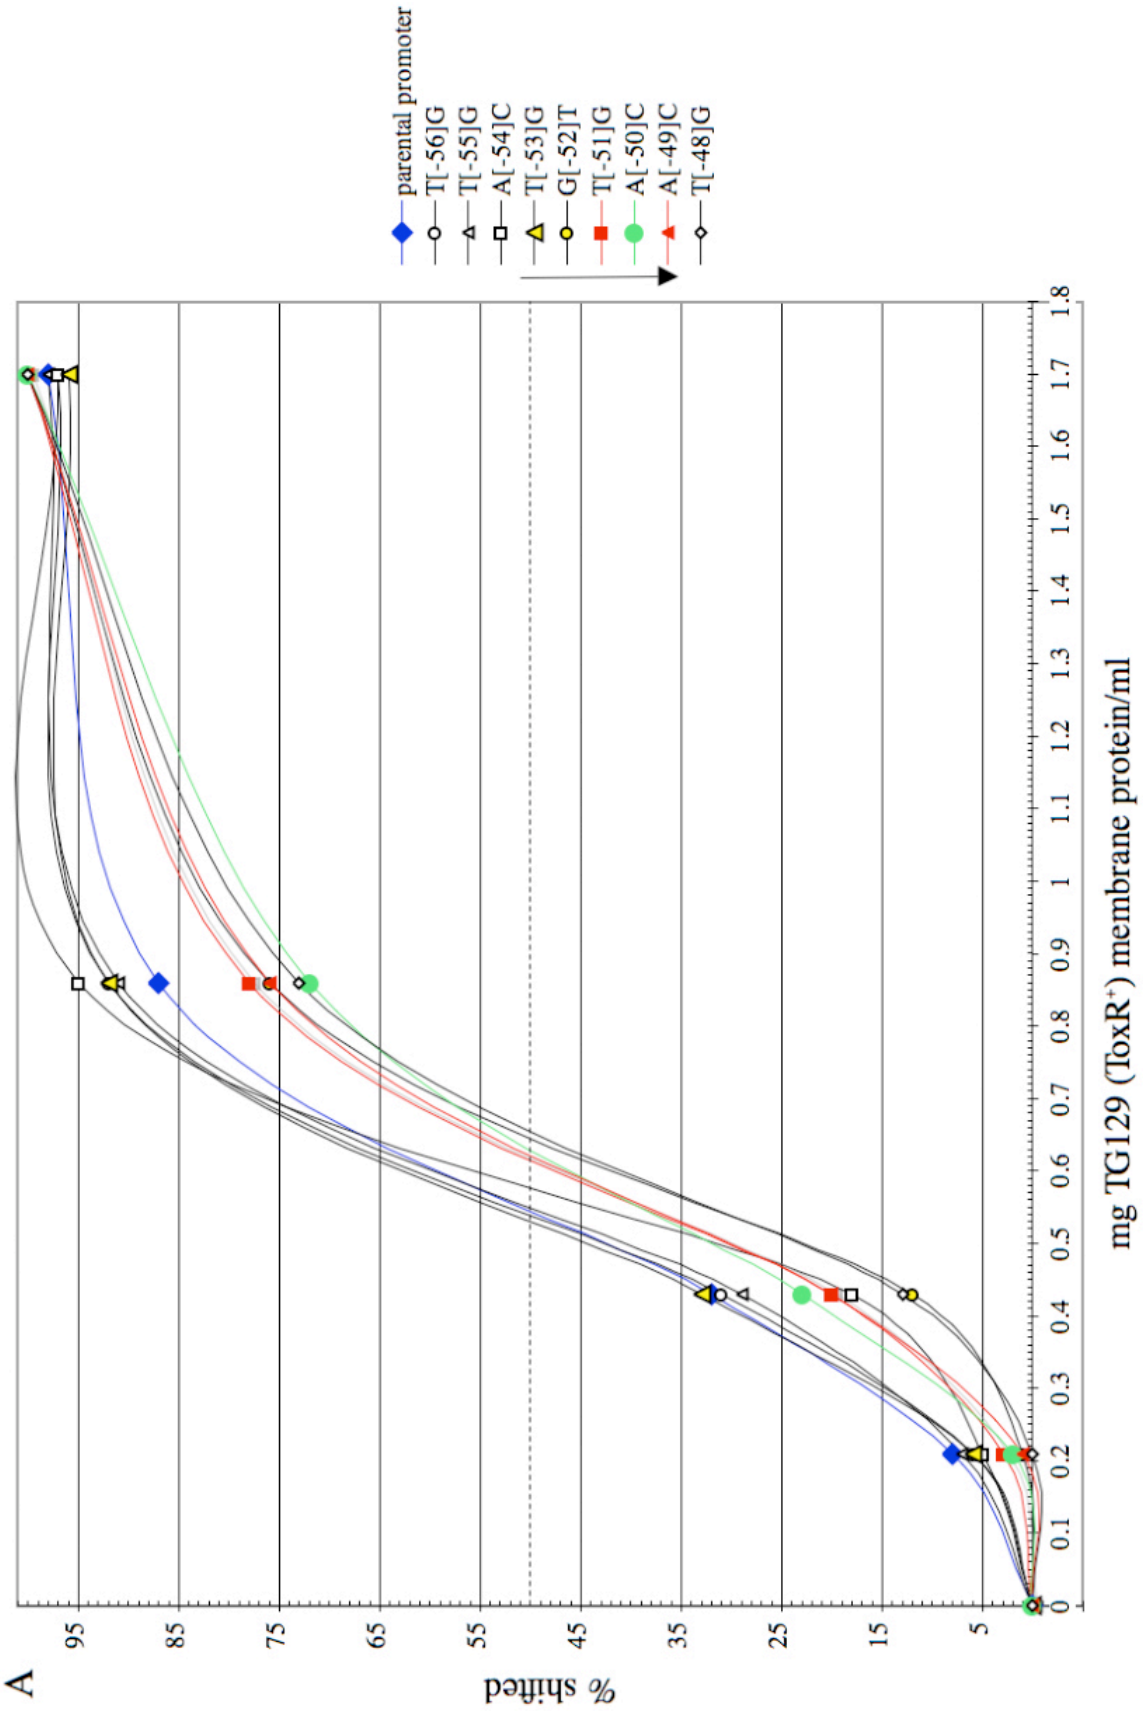



# Figure S3

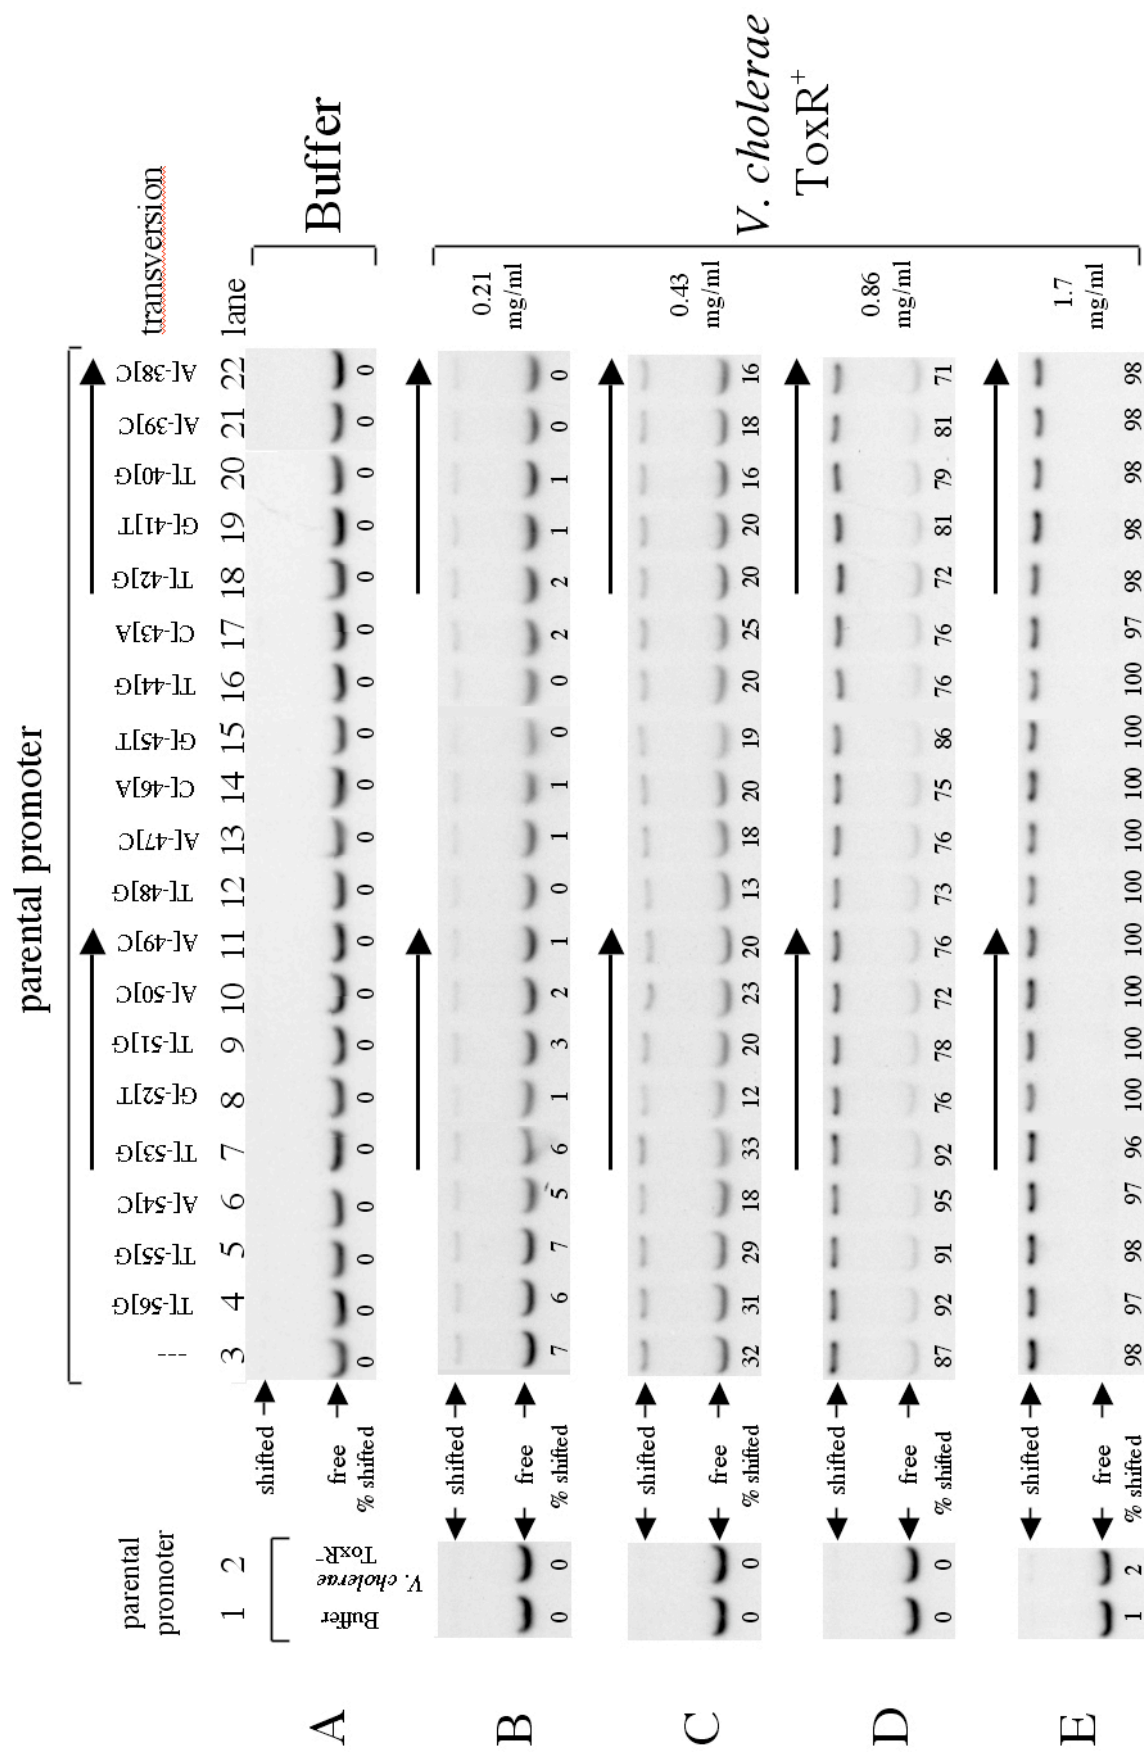

1 Table S1: Oligonucleotides used in this study

| primer name                              | purpose     | sequence 5' to 3'                               |
|------------------------------------------|-------------|-------------------------------------------------|
| <i>toxT<sub>pro</sub></i> -57 C-A TOP    | mutagenesis | catgagttactttatgttttattatgtaatacgtctgtaact      |
| <i>toxT<sub>pro</sub></i> -57 C-A BOTTOM | mutagenesis | agttacagacgtattacataataaaaacataaagtaactcatggtat |
| <i>toxT<sub>pro</sub></i> -56 T-G TOP    | mutagenesis | tactttatgtttcagatgtaatacgtctg                   |
| <i>toxT<sub>pro</sub></i> -56 T-G BOTTOM | mutagenesis | cagacgtattacataactcgaacataaagta                 |
| <i>toxT<sub>pro</sub></i> -55 T-G TOP    | mutagenesis | actttatgtttcgatgatgtaatacgtctgt                 |
| <i>toxT<sub>pro</sub></i> -55 T-G BOTTOM | mutagenesis | acagacgtattacatcatcgaacataaagt                  |
| <i>toxT<sub>pro</sub></i> -54 A-C TOP    | mutagenesis | cTTtAtgtttcGattctgtaatacgtctgta                 |
| <i>toxT<sub>pro</sub></i> -54 A-C BOTTOM | mutagenesis | tacagacgtattacagaatcgaacataaag                  |
| <i>toxT<sub>pro</sub></i> -53 T-G TOP    | mutagenesis | tttAtgtttcGattaggaatacgtctgtaa                  |
| <i>toxT<sub>pro</sub></i> -53 T-G BOTTOM | mutagenesis | ttacagacgtattacctaatcgaacataaa                  |
| <i>toxT<sub>pro</sub></i> -52 G-T TOP    | mutagenesis | ttatgtttcGattattaatacgtctgtaac                  |
| <i>toxT<sub>pro</sub></i> -52 G-T BOTTOM | mutagenesis | gttacagacgtattaaataatcgaacataa                  |
| <i>toxT<sub>pro</sub></i> -51 T-G TOP    | mutagenesis | tatgtttcGattatggaatacgtctgtaact                 |
| <i>toxT<sub>pro</sub></i> -51 T-G BOTTOM | mutagenesis | agttacagacgtattccataatcgaacata                  |
| <i>toxT<sub>pro</sub></i> -50 A-C TOP    | mutagenesis | atgtttcGattatgcatcacgtctgtaactt                 |
| <i>toxT<sub>pro</sub></i> -50 A-C BOTTOM | mutagenesis | aagttacagacgtatgacataatcgaacat                  |
| <i>toxT<sub>pro</sub></i> -49 A-C TOP    | mutagenesis | tgtttcGattatgtactacgtctgtaactg                  |
| <i>toxT<sub>pro</sub></i> -49 A-C BOTTOM | mutagenesis | caagttacagacgtagtacataatcgaaca                  |
| <i>toxT<sub>pro</sub></i> -48 T-G TOP    | mutagenesis | tgtttcGattatgtaagacgtctgtaactgttcttatgtct       |
| <i>toxT<sub>pro</sub></i> -48 T-G BOTTOM | mutagenesis | agacataagaacaagttacagacgtttacataatcgaaca        |
| <i>toxT<sub>pro</sub></i> -47 A-C TOP    | mutagenesis | tgtttcGattatgtaatccgtctgtaactgttcttatgtct       |
| <i>toxT<sub>pro</sub></i> -47 A-C BOTTOM | mutagenesis | agacataagaacaagttacagacggattacataatcgaaca       |
| <i>toxT<sub>pro</sub></i> -46 C-A TOP    | mutagenesis | tgtttcGattatgtaataagtctgtaactgttcttatgtct       |
| <i>toxT<sub>pro</sub></i> -46 C-A BOTTOM | mutagenesis | agacataagaacaagttacagacttattacataatcgaaca       |
| <i>toxT<sub>pro</sub></i> -45 G-T TOP    | mutagenesis | tcgattatgtaatacttctgtaactgttct                  |
| <i>toxT<sub>pro</sub></i> -45 G-T BOTTOM | mutagenesis | agaacaagttacagaagtattacataatcga                 |
| <i>toxT<sub>pro</sub></i> -44 T-G TOP    | mutagenesis | cgattatgtaatacggctgtaactgttctt                  |
| <i>toxT<sub>pro</sub></i> -44 T-G BOTTOM | mutagenesis | aagaacaagttacagccgtattacataatcg                 |
| <i>toxT<sub>pro</sub></i> -43 C-A TOP    | mutagenesis | gattatgtaatacgtatgtaactgttctta                  |
| <i>toxT<sub>pro</sub></i> -43 C-A BOTTOM | mutagenesis | taagaacaagttacatacgtattacataatc                 |
| <i>toxT<sub>pro</sub></i> -42 T-G TOP    | mutagenesis | attatgtaatacgtcggtaactgttcttat                  |
| <i>toxT<sub>pro</sub></i> -42 T-G BOTTOM | mutagenesis | ataagaacaagttaccgacgtattacataat                 |
| <i>toxT<sub>pro</sub></i> -41 G-T TOP    | mutagenesis | ttatgtaatacgtctttaactgttcttatg                  |
| <i>toxT<sub>pro</sub></i> -41 G-T BOTTOM | mutagenesis | cataagaacaagttaaagacgtattacataa                 |
| <i>toxT<sub>pro</sub></i> -40 T-G TOP    | mutagenesis | tatgtaatacgtctggaactgttcttatgt                  |
| <i>toxT<sub>pro</sub></i> -40 T-G BOTTOM | mutagenesis | acataagaacaagttccagacgtattacata                 |
| <i>toxT<sub>pro</sub></i> -39 A-C TOP    | mutagenesis | atgtaatacgtctgtcactgttcttatgtc                  |
| <i>toxT<sub>pro</sub></i> -39 A-C BOTTOM | mutagenesis | gacataagaacaagtgacagacgtattacat                 |



|                                                                     |                                                        |                                                              |
|---------------------------------------------------------------------|--------------------------------------------------------|--------------------------------------------------------------|
| <i>toxT<sub>pro</sub></i> -38 A-C TOP                               | mutagenesis                                            | tgtaatacgtctgtaccttgttcttatgtct                              |
| <i>toxT<sub>pro</sub></i> -38 A-C BOTTOM                            | mutagenesis                                            | agacataagaacaaggtacagacgtattaca                              |
| <i>toxT<sub>pro</sub></i> -51 T-G, -40 T-G TOP                      | mutagenesis                                            | tatgtttcgattatggaatacgtctggaacttgttcttatgt                   |
| <i>toxT<sub>pro</sub></i> -51 T-G, -40 T-G BOTTOM                   | mutagenesis                                            | acataagaacaaggtccagacgtattccataatcgaacata                    |
| <i>toxT<sub>pro</sub></i> -49 A-C, -38 A-C TOP                      | mutagenesis                                            | tgtttcgattatgtactacgtctgtaccttgttcttatgtct                   |
| <i>toxT<sub>pro</sub></i> -49 A-C, -38 A-C BOTTOM                   | mutagenesis                                            | agacataagaacaaggtacagacgtagtacataatcgaacata                  |
| <i>toxT<sub>pro</sub></i> -51 T-G, -49 A-C, -40 T-G, -38 A-C TOP    | mutagenesis                                            | tatgtttcgattatggactacgtctggaccttgttcttatgtct                 |
| <i>toxT<sub>pro</sub></i> -51 T-G, -49 A-C, -40 T-G, -38 A-C BOTTOM | mutagenesis                                            | agacataagaacaaggtccagacgtagtccataatcgaacata                  |
| <i>toxT<sub>pro</sub></i> -50 A-C, -39 A-C TOP                      | mutagenesis                                            | tgtttcgattatgcatcacgtctgtcacttgttcttatgtct                   |
| <i>toxT<sub>pro</sub></i> -50 A-C, -39 A-C BOTTOM                   | mutagenesis                                            | agacataagaacaagtgacagacgtatgacataatcgaacata                  |
| 5' <i>EcoRI toxT</i> #12                                            | cloning primer                                         | cccggaattcgaaaatggtcgatgatgat                                |
| 3' <i>EcoRI toxT</i> #15                                            | cloning primer                                         | ccggaattctactttcgagaagaaccc                                  |
| <i>toxT<sub>pro</sub></i> -172 <i>Bam</i> HI                        | cloning primer                                         | gcgcggatccgtagcaaaagcatattcagagaac                           |
| <i>toxT<sub>pro</sub></i> +45 <i>EcoRI</i>                          | cloning primer                                         | gcggaattcaataaacgcagagagccatcc                               |
| <i>XhoI</i> to <i>NotI</i>                                          | pTL61T <i>XhoI</i> site to <i>NotI</i> site conversion | tcgacgcggccg                                                 |
| wt-TcpP + basal TOP                                                 | construction of parental <i>toxT</i> promoter          | cgattatgtaatacgtctgtaacttgttcttatgtctgttatgtagttttatataact   |
| wt-TcpP + basal BOTTOM                                              | construction of parental <i>toxT</i> promoter          | aagttaataaaaactacataacagacataagaacaaggttacagacgtattacataatcg |
| ToxR binding site TOP                                               | construction of parental <i>toxT</i> promoter          | tggctgttatcttatctcaaaaaacataaaataaacatgagttactttatggtt       |
| ToxR binding site BOTTOM                                            | construction of parental <i>toxT</i> promoter          | aaacataaagtaactcatgttattttatgtttttgagataagataaacagccaa       |
| 5' <i>toxR-HA</i>                                                   | epitope tagging of <i>toxR</i>                         | gggggatcctcaaaagatatcgatgag                                  |
| 3' <i>toxR-HA</i>                                                   | epitope tagging of <i>toxR</i>                         | ggggggctcgagctcacacactttgatggc                               |
